# Supplementary material for: Non-adaptive territory selection by a bird with exceptionally long parental care
Source: PeerJ journal article supplement (doi:10.7717/peerj.1852), 2016-03-24

**a**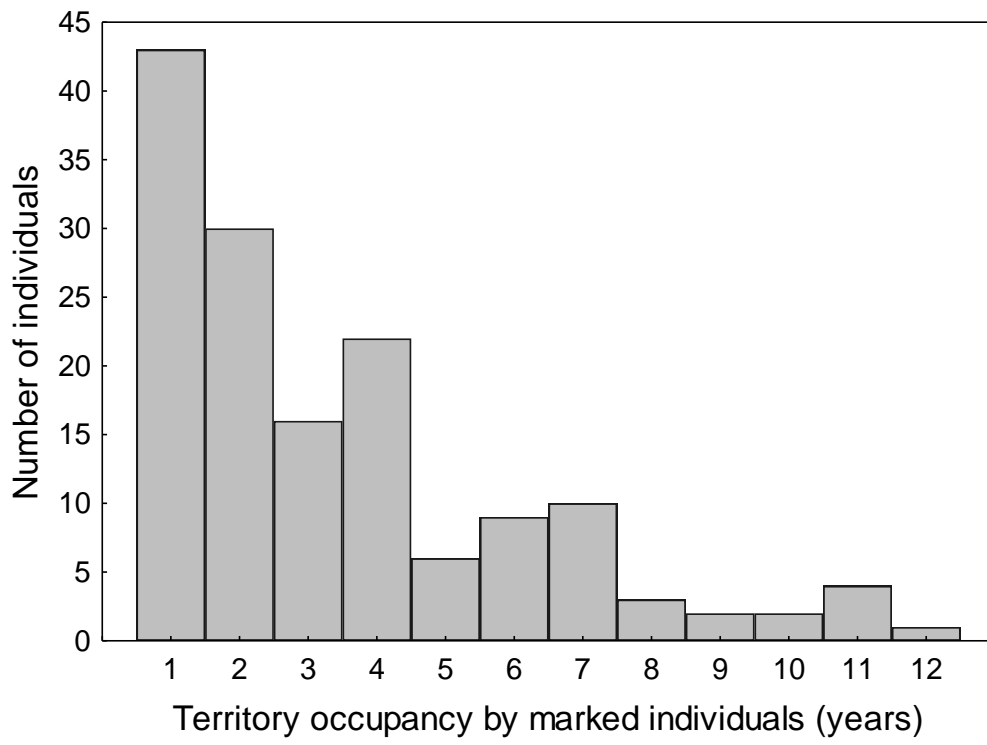**b**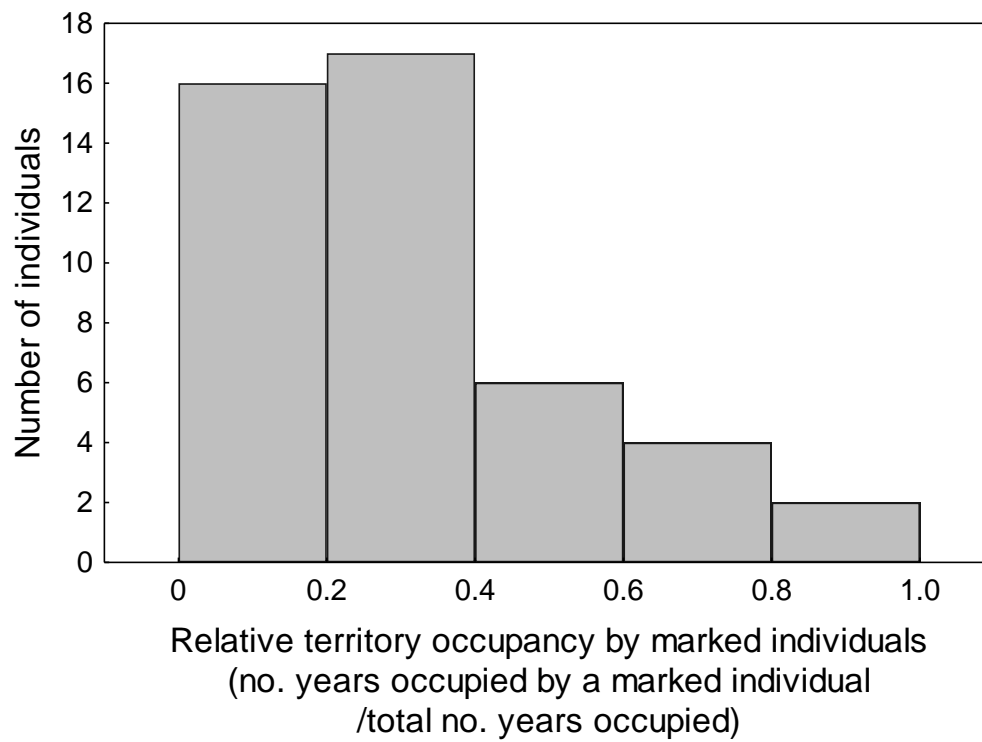

Supplement: Fig_S2.pdf [file Fig_S2.pdf]
