# Supplementary material for: Non-adaptive territory selection by a bird with exceptionally long parental care
Source: PeerJ. 2016 Mar 24;4:e1852. doi: 10.7717/peerj.1852 (PMC4811171; doi:10.7717/peerj.1852)
Supplement: Supplemental Information 3 — Raw data. [file peerj-04-1852-s003.xlsx]

## Sheet: REPRODUCTIVE DATA
TERRITORY ID	YEAR	LAYING DATE	CLUTCH SIZE	HATCHING SUCCESS	REPRODUCTIVE SUCCESS	OCCUPANCY	OCCUPANCY CATEGORY
a	1999	90	7	6	4	0.182	1
a	2001	114	6	6	3	0.182	1
aa	1997				3	0.5	3
aa	1998		6	6		0.5	3
aa	1999	90	6	6		0.5	3
aa	2001	114	6	4	2	0.5	3
aa	2012	109	6	0	0	0.5	3
ab	1999		6			0.222	2
ac	1997			8	7	0.789	4
ac	1998			8	8	0.789	4
ac	1999	101	5	3	2	0.789	4
ac	2000			5	4	0.789	4
ac	2001			5	5	0.789	4
ac	2003			4	3	0.789	4
ac	2004			4	2	0.789	4
ac	2005	135	6	0	0	0.789	4
ac	2005	137	4	4	0	0.789	4
ac	2006	121	4	4	2	0.789	4
ac	2007				7	0.789	4
ac	2008	105	8	8	8	0.789	4
ac	2009	99	7	7	4	0.789	4
ac	2010	101	8	7	7	0.789	4
ac	2011	112	6	6	2	0.789	4
ac	2012				2	0.789	4
ad	1998			6	2	0.579	3
ad	1999				2	0.579	3
ad	2002	103	3	2	2	0.579	3
ad	2004			6	4	0.579	3
ad	2005	122	6	6	4	0.579	3
ad	2007			7	5	0.579	3
ad	2008			4	0	0.579	3
ad	2009	127	6	6	5	0.579	3
ad	2010		4	0	0	0.579	3
ad	2011	110	4	0	0	0.579	3
ad	2012	90	9	8	5	0.579	3
ae	2005	107	7	7	5	0.158	1
ae	2007			8	7	0.158	1
af	2014			1	1	0.105	1
af	2015	102	8	7	3	0.105	1
ag	2000	98	5	2	2	0.737	4
ag	2001		6	4	2	0.737	4
ag	2002	78	9	9	7	0.737	4
ag	2003			3	3	0.737	4
ag	2004		7	6	6	0.737	4
ag	2004		4	0	0	0.737	4
ag	2007			9	8	0.737	4
ag	2008	113	10	0	0	0.737	4
ag	2009	106	7	7	3	0.737	4
ag	2010	119	6	4	3	0.737	4
ag	2011				3	0.737	4
ag	2013	116	8	8	2	0.737	4
ag	2014	86	9	7	7	0.737	4
ag	2015	96	8	8	8	0.737	4
ah	1997				2	0.368	2
ah	2009	107	7	7	6	0.368	2
ah	2010	100	7	7	6	0.368	2
ah	2011	86	8	8	8	0.368	2
ah	2012	93	8	8	8	0.368	2
ah	2013	104	8	8	4	0.368	2
ah	2014	120	6	6	6	0.368	2
ai	2008	144	3	0	0	0.1	1
aj	2000	101	6	0	0	0.941	5
aj	2001	114	3	3		0.941	5
aj	2002	103	5	4		0.941	5
aj	2003				0	0.941	5
aj	2005	95	6	1	0	0.941	5
aj	2006	120	6			0.941	5
aj	2008	87	5	5		0.941	5
aj	2009	110	2	0	0	0.941	5
aj	2010	104	4	0	0	0.941	5
aj	2011				4	0.941	5
aj	2012	92	5	3	2	0.941	5
aj	2013	119	6	0	0	0.941	5
aj	2014		6	0	0	0.941	5
aj	2015		6	0	0	0.941	5
ak	2005	101	6	7	7	0.909	5
ak	2006	144	5	5	5	0.909	5
ak	2007			0	0	0.909	5
ak	2009	111	5	5	0	0.909	5
ak	2010		1	0	0	0.909	5
ak	2011	103	5	0	0	0.909	5
ak	2012	101	7	6	4	0.909	5
ak	2013	121	6	5	4	0.909	5
ak	2014	103	7	5	1	0.909	5
ak	2015	88	8	6	5	0.909	5
am	2008	111	6	6	4	0.235	2
am	2012				1	0.235	2
am	2014				4	0.235	2
an	1999			5	5	0.882	5
an	2000	100	4	4	4	0.882	5
an	2002	150	4	0	0	0.882	5
an	2003	111	6	4	4	0.882	5
an	2004	109	6	3		0.882	5
an	2005	110	4	3	3	0.882	5
an	2007	93	7	7	7	0.882	5
an	2008	111	6	6	4	0.882	5
an	2009	106	6	6	2	0.882	5
an	2010	109	8	7	5	0.882	5
an	2011	109	8	5	0	0.882	5
an	2013				4	0.882	5
an	2014				4	0.882	5
an	2015				3	0.882	5
ao	1997			6	6	0.583	3
ao	1998	158	4	3	3	0.583	3
ao	1999	124	3	3		0.583	3
ao	2001	99	4	4	2	0.583	3
ao	2006			5	5	0.583	3
ao	2007	131	3	0	0	0.583	3
ao	2010	102	6	0	0	0.583	3
ap	1998				3	0.529	3
ap	2003				6	0.529	3
ap	2004		4	4	3	0.529	3
ap	2005		6	6	5	0.529	3
ap	2006				3	0.529	3
ap	2008	81	9	8	7	0.529	3
ap	2009			7	7	0.529	3
ap	2010				4	0.529	3
at	1998				3	0.875	5
at	2000	105	5	5	0	0.875	5
at	2001	109	4	0	0	0.875	5
at	2002	88	7	0	0	0.875	5
at	2004			5	2	0.875	5
at	2005			6	4	0.875	5
at	2006	113	5	5	4	0.875	5
at	2007	114	4	4	3	0.875	5
at	2007	92	6	0	0	0.875	5
at	2008	100	4	3	2	0.875	5
at	2011	128	6	0	0	0.875	5
at	2012	91	8	8	7	0.875	5
at	2013	113	8	8	6	0.875	5
at	2014	84	8	8		0.875	5
at	2015				6	0.875	5
au	1997				8	0.643	4
au	1998			6	4	0.643	4
au	1999	93	6	6	4	0.643	4
au	2001		8	8		0.643	4
au	2004			8	4	0.643	4
au	2005	104	5	4	2	0.643	4
au	2006			5	5	0.643	4
ay	2015			5	5	0.09	1
az	1999		8	5	4	0.2	1
az	2009	105	7	3	3	0.2	1
az	2010	114	4	0	0	0.2	1
b	2000	110	3	0	0	0.727	4
b	2002	76	8	8	5	0.727	4
b	2004	93	7	7	5	0.727	4
b	2005	101	6	6	6	0.727	4
b	2006	94	7	5	5	0.727	4
b	2007	71	7	0	0	0.727	4
b	2010	106	6	5		0.727	4
ba	1997				4	0.333	2
ba	2006	112	5	5	5	0.333	2
ba	2007		2	0	0	0.333	2
ba	2007			3	2	0.333	2
ba	2009	90	6	6	4	0.333	2
ba	2010	106	5	0	0	0.333	2
bb	2001			5	5	0.5	3
bb	2002	88	8	7	7	0.5	3
bb	2003	128	5	0	0	0.5	3
bb	2005	120	7	0	0	0.5	3
bb	2006	116	5	4	3	0.5	3
bb	2007			0	0	0.5	3
bb	2008	95	6	0	0	0.5	3
bd	2002	81	8	8	8	0.25	2
bd	2003		2	0	0	0.25	2
bd	2003			5	5	0.25	2
bd	2015				1	0.25	2
be	2004		8	8	7	0.563	3
be	2005	86	8	8	8	0.563	3
be	2006			1	0	0.563	3
be	2007	84	7	7	6	0.563	3
be	2008	90	7	6	6	0.563	3
be	2009	89		7	6	0.563	3
be	2010	98	7	6	6	0.563	3
be	2011		7	6	4	0.563	3
be	2012				1	0.563	3
bf	2008	126	5	5	5	0.188	1
bf	2009	114	6	6	4	0.188	1
bf	2011	121	5	0	0	0.188	1
bh	2005			7	3	0.8	4
bh	2006			7	7	0.8	4
bh	2007		10	10	7	0.8	4
bh	2008	91	8	7	6	0.8	4
bh	2010	96	9	9	4	0.8	4
bh	2011	93	8	8	3	0.8	4
bh	2014	94	5	4	4	0.8	4
bj	1998			8	8	0.364	2
bj	2001	99	6	6	0	0.364	2
bj	2003			3		0.364	2
bj	2007	95	5	5	3	0.364	2
bk	1997				1	0.316	2
bk	1998			7	1	0.316	2
bk	1999	100	7	7	6	0.316	2
bk	2000	103	7	7	1	0.316	2
bk	2009				2	0.316	2
bk	2011	123	6	4	0	0.316	2
bl	2002			5	5	0.286	2
bl	2003	104	8	8	6	0.286	2
bl	2004			6	5	0.286	2
bl	2005			5	5	0.286	2
bn	1997		7	6	4	0.632	4
bn	1998			6	6	0.632	4
bn	1999	93	6	6	5	0.632	4
bn	2000	82	7	7	5	0.632	4
bn	2001	90	7	7	5	0.632	4
bn	2002	85	6	6	3	0.632	4
bn	2003	92	7	7	4	0.632	4
bn	2004	89	6	5	1	0.632	4
bn	2005	103	7	5	4	0.632	4
bn	2009	105		0	0	0.632	4
bn	2010	94	5	2	0	0.632	4
bn	2010	117	4	0	0	0.632	4
bo	2006	102	6	3	3	0.211	2
bo	2007	85	8	6	6	0.211	2
bo	2008	102	7	7	6	0.211	2
bo	2009	114	4	0	0	0.211	2
br	2007				4	0.133	1
br	2015		6	4	3	0.133	1
bs	1997			6	6	0.412	3
bs	1999	94	6	6	6	0.412	3
bs	2001	93	6	6	6	0.412	3
bs	2005	103	1	0	0	0.412	3
bs	2008	111	6	6	3	0.412	3
bs	2014	97	7		4	0.412	3
bs	2015	82	7	0	0	0.412	3
bt	1999	94	6	6	5	0.211	2
bt	2001	127	6	0	0	0.211	2
bt	2007	121	6	5	1	0.211	2
bt	2015	82	7	7	6	0.211	2
bu	2000	112	4	0	0	0.529	3
bu	2001	95	4	4	3	0.529	3
bu	2004				4	0.529	3
bu	2008				6	0.529	3
bu	2009			6		0.529	3
bu	2010	98	7	7	6	0.529	3
bu	2011	112	6	6	5	0.529	3
bu	2014	76	9	9	5	0.529	3
bu	2015	89	7	7	5	0.529	3
bx	1997			5	5	0.944	5
bx	1998			7	7	0.944	5
bx	1999	96	8	7	7	0.944	5
bx	2000	106	6	6	4	0.944	5
bx	2002	102	5	5	4	0.944	5
bx	2003	134	4	0	0	0.944	5
bx	2004		7	5	5	0.944	5
bx	2005	111	5	4	3	0.944	5
bx	2006	105	6	5	5	0.944	5
bx	2007	100	7	5	5	0.944	5
bx	2008	108	3	0	0	0.944	5
bx	2009	108	6	6	3	0.944	5
bx	2010	110	5	0	0	0.944	5
bx	2012	87	7	7	6	0.944	5
bx	2013	113	6	6	3	0.944	5
by	1997			3	3	0.417	3
by	2000	92	9	9	7	0.417	3
by	2001	110	6	6	3	0.417	3
by	2002	121	6	3	3	0.417	3
bz	2002	93	6	6	5	0.417	3
bz	2003	102	5	5	4	0.417	3
bz	2009			4	4	0.417	3
ca	1997			5	5	0.941	5
ca	1998			7	7	0.941	5
ca	1999	95	8	8	6	0.941	5
ca	2000	104	7	7	7	0.941	5
ca	2001	104	9	8	7	0.941	5
ca	2002	105	9	9	5	0.941	5
ca	2003	133	6	6	4	0.941	5
ca	2004	115	6	6	6	0.941	5
ca	2005	140	5	5	5	0.941	5
ca	2006	127	5	5	4	0.941	5
ca	2007	109	4	4	3	0.941	5
ca	2008	99	4	1	1	0.941	5
ca	2009			3	3	0.941	5
ca	2010	122	5	5	5	0.941	5
ca	2012				4	0.941	5
ca	2013				2	0.941	5
cb	2001	134	5	5	3	0.588	3
cb	2002	108	6	5	5	0.588	3
cb	2003	135	5	1	0	0.588	3
cb	2004				4	0.588	3
cb	2005	122	7	6	0	0.588	3
cb	2007	87	6	6	5	0.588	3
cb	2008	113	3	3	0	0.588	3
cb	2010	122	5	5	4	0.588	3
cb	2011	120	5	5	4	0.588	3
cd	2003	137	3	3	0	0.353	2
cd	2005	135	5	5	3	0.353	2
cd	2006	165	4	0	0	0.353	2
cd	2007	122	5	3	0	0.353	2
cd	2008	127	5	5	4	0.353	2
cd	2010			3	3	0.353	2
ce	2005	124	3	0	0	0.235	2
ce	2007	86	7	7	7	0.235	2
ce	2011	135	4	4	4	0.235	2
cf	2007	117	5	0	0	0.059	1
cg	1997			6	6	0.647	4
cg	1998				6	0.647	4
cg	2002	111	3	3	3	0.647	4
cg	2005	120	7	7	4	0.647	4
cg	2006	127	5	5	5	0.647	4
cg	2007	96	7	7	6	0.647	4
cg	2008	89	7	6	3	0.647	4
cg	2009	99	6	6	6	0.647	4
cg	2010	139	5	5	1	0.647	4
cg	2013				3	0.647	4
ch	1997			7	7	0.5	3
ch	1999	124	1	0	0	0.5	3
ch	1999			4	4	0.5	3
ch	2001	111	8	8		0.5	3
ch	2004	125	6	6	0	0.5	3
ch	2010	120	5	3	3	0.5	3
ci	1999	135	3	3	2	0.75	4
ci	2000	121	6	6	3	0.75	4
ci	2001	86	7	7	5	0.75	4
ci	2002	77	7	6	6	0.75	4
ci	2004	132	4	4	2	0.75	4
ci	2005	123	4	4	4	0.75	4
ci	2006	134	4	3	3	0.75	4
ci	2007	84	9	9	8	0.75	4
ci	2008	109	7	7	5	0.75	4
ci	2009	127	5	5	4	0.75	4
ci	2010	123	4	4	3	0.75	4
ci	2012				3	0.75	4
cj	1997			5	5	0.824	5
cj	2000	112	6	5	5	0.824	5
cj	2001	107	6	0	0	0.824	5
cj	2001				1	0.824	5
cj	2002	101	8	8	8	0.824	5
cj	2003	134	5	4	3	0.824	5
cj	2005	142	5	5	5	0.824	5
cj	2006	130	5	0	0	0.824	5
cj	2007	92	8	7	6	0.824	5
cj	2008	105	6	6	5	0.824	5
cj	2009	113	6	5	4	0.824	5
cj	2011	143	6	4	2	0.824	5
cj	2012				5	0.824	5
cj	2013				2	0.824	5
ck	2000			4	3	0.385	2
ck	2001	106	7	6	6	0.385	2
ck	2002	119	6	4	4	0.385	2
ck	2004			6	5	0.385	2
ck	2005	121	6	5	5	0.385	2
ck	2005	116	1	0	0	0.385	2
ck	2010	139	5	4	3	0.385	2
cl	2004			5	3	0.538	3
cl	2007			5		0.538	3
cl	2008	131	6	6	4	0.538	3
cl	2009	134	5	5	5	0.538	3
cl	2011	124	5	4	3	0.538	3
cm	2007	98	5	4	3	0.538	3
cm	2008	126	6	6	5	0.538	3
cm	2009	109	3	3	0	0.538	3
cm	2010	122	5	5	0	0.538	3
cm	2011	125	4	1	0	0.538	3
cm	2012				5	0.538	3
cm	2013			6	0	0.538	3
cn	1998			5	5	0.286	2
cn	1999		7	6	3	0.286	2
cn	2001	110	7	5	5	0.286	2
cn	2004			0	0	0.286	2
co	2004	109	5	5	5	0.25	2
co	2005	106	8	8	7	0.25	2
co	2006	108	7	7	6	0.25	2
co	2007			0	0	0.25	2
cp	2006	117	5	0	0	0.063	1
cr	2002	73	9			0.2	1
cr	2007			7	6	0.2	1
cs	2005	128	4	4	3	1	5
cs	2006	108	5	5	4	1	5
cs	2007	81		7	2	1	5
cs	2008	96	8	6	0	1	5
cs	2009	91	9	9	8	1	5
cs	2010	93	8	6	4	1	5
cs	2011	88	7	4	4	1	5
cs	2012	92	7	6	4	1	5
cs	2013	96	3	1	0	1	5
cs	2014		3	0	0	1	5
cs	2014		2	1	1	1	5
cs	2015	88	8	6	6	1	5
ct	1998			5	5	0.643	4
ct	2000		6	5		0.643	4
ct	2001	93	6	6	3	0.643	4
ct	2002	90	8	8	8	0.643	4
ct	2003	102	6	6	6	0.643	4
ct	2005	116	6	6	5	0.643	4
ct	2006	102	7	7	4	0.643	4
cu	1997			5	5	0.105	1
cu	1998			2	1	0.105	1
cw	2007	108	6	5	3	0.316	2
cw	2008	100	8	7	7	0.316	2
cw	2009	97	7	7	3	0.316	2
cw	2011	98	7	7	5	0.316	2
cw	2012	94	7	7	6	0.316	2
cw	2014	82	8	8	8	0.316	2
cx	1997				2	0.556	3
cx	1998			5	5	0.556	3
cx	2002			5		0.556	3
cx	2003			5		0.556	3
cx	2006			6	3	0.556	3
cx	2007			8	8	0.556	3
cx	2007			8	8	0.556	3
cx	2008			2	0	0.556	3
cx	2013				6	0.556	3
cy	2004				6	0.833	5
cy	2005	81	9	9	8	0.833	5
cy	2006	127	6	5	4	0.833	5
cy	2007	83	5		4	0.833	5
cy	2008	82	8	8	8	0.833	5
cy	2009		9	9	8	0.833	5
cy	2010				3	0.833	5
cy	2011				8	0.833	5
cy	2012	98	4	4	2	0.833	5
cy	2014			8	8	0.833	5
cz	2014	110	5	5	5	0.2	1
cz	2015	88	6	6		0.2	1
d	2005	111	5	5	4	0.235	2
d	2006	102	7	0	0	0.235	2
d	2007	110	6	5	4	0.235	2
d	2009	109	3	3	2	0.235	2
d	2011	93	6	6	4	0.235	2
da	1997			8	4	0.5	3
da	1998			4	2	0.5	3
da	1999			6	5	0.5	3
da	2000	90	7	5	3	0.5	3
da	2001	104	6	6	2	0.5	3
da	2002			5	5	0.5	3
da	2003			4	4	0.5	3
db	1997			7	3	0.583	3
db	2005				4	0.583	3
db	2007	121	6	6	5	0.583	3
db	2008			6	6	0.583	3
db	2009	104	5	5	5	0.583	3
db	2010	121	6	6	6	0.583	3
db	2014	99	6	6	6	0.583	3
dc	2007	114	7	7	5	0.538	3
dc	2009	114	5	5	0	0.538	3
dc	2010	122	5	4	4	0.538	3
dc	2011	98	7	7	6	0.538	3
dc	2012	129	4	4	1	0.538	3
dc	2013				5	0.538	3
dc	2014		3	0	0	0.538	3
dc	2014	109	6	6	5	0.538	3
dd	2009	144	5	5	4	0.364	2
dd	2010	114	6	6	6	0.364	2
de	2000	148	4	3	1	0.364	2
de	2008	117	6	4	4	0.364	2
df	1999	105	7	7	6	0.583	3
df	2000	124	6	6	4	0.583	3
df	2001	114	6	6	6	0.583	3
df	2002	87	8	8	8	0.583	3
df	1997			5	5	0.583	3
df	1998				6	0.583	3
df	2014	102	6	6	6	0.583	3
df	2014	95	6	6	6	0.583	3
df	2015	108	2	0	0	0.583	3
dg	2015				5	0.166	1
dk	1997			1	1	0.556	3
dk	2000	119	4	4	4	0.556	3
dk	2001	101	6	5	5	0.556	3
dk	2002	87	8	8	7	0.556	3
dk	2009	111	5	5	4	0.556	3
dk	2010	112	6	6	5	0.556	3
dk	2011	106	8	8	7	0.556	3
dk	2012	106	8	8	5	0.556	3
dk	2013	118	6	5	4	0.556	3
dk	2013	141	3	0	0	0.556	3
dl	2013			5	5	0.059	1
dm	1998			8	7	0.417	3
dm	2001	109	7	5	4	0.417	3
dm	2004			6	0	0.417	3
dm	2008			4	4	0.417	3
dn	1997			7	5	1	5
dn	1998			7	7	1	5
dn	1999	111	7	5	5	1	5
dn	2000	97	8	8	4	1	5
dn	2001	97	8	7	7	1	5
dn	2002	80	7	7	5	1	5
dn	2003	111	5	5	5	1	5
dn	2004	108	4	4	4	1	5
dn	2006				5	1	5
dn	2007	105	6	1	1	1	5
dn	2008	93	8	8	8	1	5
dn	2009	125	3	2	2	1	5
dn	2010	108	7	0	0	1	5
dn	2011	91	8	8	8	1	5
dn	2012	99	6	6	6	1	5
dn	2013	116	6	6	6	1	5
dn	2014	81	8	8	5	1	5
dn	2015	85	7	1	0	1	5
do	2012			0	0	0.222	2
do	2013	122	6	5	5	0.222	2
do	2014		6	0	0	0.222	2
do	2014	121	6	5	5	0.222	2
do	2015	120	4	3	3	0.222	2
dp	2010	170	4	3	1	0.222	2
dp	2010	96	4	0	0	0.222	2
dp	2011	98	8	8	4	0.222	2
dp	2014	121	2	0	0	0.222	2
dp	2014	145	1	0	0	0.222	2
dp	2014	150	3	3	0	0.222	2
dr	2014	103	6	6	5	0.111	1
dr	2015	101	6	0	0	0.111	1
dt	2003	138	5	5	5	0.556	3
dt	2005	99	6		5	0.556	3
dt	2006	101	6	0	0	0.556	3
dt	2006	134	6	0	0	0.556	3
dt	2007	85	7	7	6	0.556	3
dt	2000			2	2	0.556	3
du	2004	132	3	3	1	0.438	3
du	2006	117	3	0	0	0.438	3
du	2008	131	6	6	2	0.438	3
du	2009	126	4	4	0	0.438	3
du	2013	123	4	4	4	0.438	3
du	2015	132	7	1	1	0.438	3
du	2001	123	5	0	0	0.438	3
dv	2006	110	4	0	0	0.063	1
dw	2006	132	3	0	0	0.25	2
dw	2015	105	5	5	4	0.25	2
dw	2001	155	1	0	0	0.25	2
dw	2002	91	5	0	0	0.25	2
dx	2006	136	4	0	0	0.063	1
dy	2006	109	7	5	2	0.727	4
dy	2008	98	6	6	3	0.727	4
dy	2010	105	6	6	6	0.727	4
dy	2012			6	4	0.727	4
dy	2014	104	6	6	2	0.727	4
dy	1999	89	7	7	6	0.727	4
dy	2000	88	6	0	0	0.727	4
dz	2010	104	4	3	2	0.235	2
dz	2015	116	7	5	3	0.235	2
dz	1998			4	3	0.235	2
dz	2002	114	2	0	0	0.235	2
dz	2002			0	0	0.235	2
e	2009	103		6	6	0.118	1
e	2010	106	6	6	4	0.118	1
ea	2009	133	6	5	1	0.471	3
ea	2013	122	4	3	2	0.471	3
ea	2015	112	5	4	4	0.471	3
ea	1997			7	7	0.471	3
ea	1998			6	1	0.471	3
ea	1999	89	7	7	6	0.471	3
ea	2000	109	7	6	6	0.471	3
ea	2001	102	6	6	5	0.471	3
eb	2006		2	0	0	0.588	3
eb	2008	99	8	8	8	0.588	3
eb	2009	111	4	4	4	0.588	3
eb	2011	124	4	3	3	0.588	3
eb	2012	135	4	0	0	0.588	3
eb	2015	126	7	7	6	0.588	3
eb	1997			2	2	0.588	3
eb	1998			5	5	0.588	3
eb	1999	89	7	6	6	0.588	3
eb	2001		2	0	0	0.588	3
ec	2004	114	5	5	4	0.273	2
ec	2012	106	6	6	6	0.273	2
ec	2014	104	6	6	1	0.273	2
ed	2006	108	7	3	2	0.538	3
ed	2008	115	6	6		0.538	3
ed	2009	110	5	5	0	0.538	3
ed	2010	123	5	5	5	0.538	3
ed	2012	98	7	7	7	0.538	3
ed	1999	122	5	0	0	0.538	3
ed	2002	99	7	7	5	0.538	3
ee	2004	102	5	4	0	0.462	3
ee	2005	130	5	0	0	0.462	3
ee	2009	101	6	0	0	0.462	3
ee	1997			6	6	0.462	3
ee	1999	87	9	9	9	0.462	3
ee	2000	98	6	5	2	0.462	3
ef	2007	118	6	6	4	0.267	2
ef	2014	121	4	4	4	0.267	2
ef	2015	118	5	5	5	0.267	2
eg	2012	92	6	6	6	0.231	2
eg	2013	112	7	6	4	0.231	2
eg	2014	108	7	7	6	0.231	2
eh	2004			0	0	0.25	2
eh	2007			0	0	0.25	2
eh	2013	129	3	3	3	0.25	2
ei	2004	134	5	4	3	0.273	2
ei	2007	123	6	4	3	0.273	2
ei	2001	121	7	0	0	0.273	2
ej	2007	113	4	4	4	0.077	1
ek	2004	124	4	4	4	0.5	3
ek	2006	108	7	7	4	0.5	3
ek	2008	157	5	2	0	0.5	3
ek	2010	105	6	5	0	0.5	3
ek	2002	97	6	6	6	0.5	3
el	2007	86	7	2	2	0.429	3
el	2010	106	5	0	0	0.429	3
el	2014				5	0.429	3
em	2002	120	5	5	0	0.545	3
em	1999				5	0.545	3
em	2001			6	6	0.545	3
em	2003			5		0.545	3
en	1998			6	3	0.182	1
en	2003		7	7	4	0.182	1
eo	1999	104	7	0	0	0.091	1
er	2000	84	7	6	1	0.25	2
er	2001	97	7	7	5	0.25	2
er	1997				2	0.25	2
er	1998			3	2	0.25	2
es	1998			8	8	0.235	2
es	1999	115	5	5	5	0.235	2
es	2014				1	0.235	2
es	2015	129	3	3	3	0.235	2
eu	2010	122	6	0	0	0.056	1
ev	2008			5	5	0.158	1
ev	2009			1	0	0.158	1
ev	2010			4	2	0.158	1
ew	1997			5	5	0.579	3
ew	1999			5	4	0.579	3
ew	2000			5	5	0.579	3
ew	2005	107	7	5	4	0.579	3
ew	2007			5	5	0.579	3
ew	2008			6	6	0.579	3
ew	2009			5	5	0.579	3
ew	2010			3	3	0.579	3
ew	2002	87	7	7	6	0.579	3
ew	2004				5	0.579	3
ey	1998		6		3	0.666	4
ey	2000	117	5	5	5	0.666	4
ey	2003	109	4	4	4	0.666	4
ey	2008			7	7	0.666	4
ey	2009			0	0	0.666	4
ey	2011	98	7	7	7	0.666	4
ez	2010	118	2	1	1	0.316	2
ez	2011	116	5	4	4	0.316	2
ez	2012	98	7	0	0	0.316	2
ez	2014	86	7	6	5	0.316	2
ez	2015	87	7	2	2	0.316	2
f	2004	92	6	5	5	0.118	1
f	2012	117	4	0	0	0.118	1
fa	2007			3		0.526	3
fa	2008	120	5	5	4	0.526	3
fa	2009	101	6	6	4	0.526	3
fa	2010	114	6	1	0	0.526	3
fa	2011	99	7	7	4	0.526	3
fa	2012	100	5	0	0	0.526	3
fa	2012				4	0.526	3
fa	2013	113	6	6	4	0.526	3
fa	2000	132	5	4	3	0.526	3
fa	2001	103	7	7	4	0.526	3
fa	2002	100	7	6	5	0.526	3
fb	2006	128	5	5	0	0.579	3
fb	2007	105	6	6	3	0.579	3
fb	2011	93	6	0	0	0.579	3
fb	2013	114	5	0	0	0.579	3
fb	2014	107	5	5	4	0.579	3
fb	2015	103	6	5	5	0.579	3
fb	1997			4		0.579	3
fb	1999	97	7	7		0.579	3
fb	2001	92	8	8	7	0.579	3
fb	2002	109	6	6	3	0.579	3
fc	2013	113	6	0	0	0.158	1
fc	2014	91	6	6	6	0.158	1
fd	2004	112	6	6	4	0.059	1
fe	2003	110	6	6	4	0.474	3
fe	2004	114	4	4	3	0.474	3
fe	2005				0	0.474	3
fe	2007	110	6	6	5	0.474	3
fe	2008		5	5	4	0.474	3
fe	2011	115	4	4	0	0.474	3
fe	2013	116	3	3	2	0.474	3
fe	2014			2	0	0.474	3
fe	2015	99	5	5	4	0.474	3
fe	1999	106	5	4	4	0.474	3
ff	2011	116	3	0	0	0.053	1
fg	2004	108	5	5	5	0.158	1
fg	2013			5	5	0.158	1
fg	2002	122	6	6	5	0.158	1
fh	2004	113	5	5	0	0.211	2
fh	2009	108	6	6		0.211	2
fh	2000	93	8	8	8	0.211	2
fi	2005	101	6	4	4	0.632	4
fi	2007	114	5	5	1	0.632	4
fi	2008	109	5	1	1	0.632	4
fi	2009	101	6	6	4	0.632	4
fi	2010	115	5	0	0	0.632	4
fi	2013	122	7	7	6	0.632	4
fi	2014	91	6	6	6	0.632	4
fi	2015	112	5	5	3	0.632	4
fi	1998			6	4	0.632	4
fi	2000	138	4	0	0	0.632	4
fi	2002	90	7	6	6	0.632	4
fj	2003	111	5	5	4	0.579	3
fj	2006	127	6	5	0	0.579	3
fj	2007			7	3	0.579	3
fj	2008	115	6	6	1	0.579	3
fj	2010	119	6	5	5	0.579	3
fj	2011	108	6	5	5	0.579	3
fj	2012			5	5	0.579	3
fj	2013			4	3	0.579	3
fj	2014	112	5	5	2	0.579	3
fj	2015	98	8	7	7	0.579	3
fj	2004	91	7	6	6	0.579	3
fk	2004	90	8	8	1	0.579	3
fk	2005	117	4	4	0	0.579	3
fk	2006	103	6	6	5	0.579	3
fk	2007	82	7	7	7	0.579	3
fk	2009	90	7	7		0.579	3
fk	2010	113	7	7	7	0.579	3
fk	2012	95	6	6	3	0.579	3
fk	2013	118	4	0	0	0.579	3
fk	2015	99	5	0	0	0.579	3
fk	2001	103	7	6	5	0.579	3
fk	2002	124	4	4	3	0.579	3
fl	2008	82	7	7	7	0.158	1
fl	2012	96	5	4	4	0.158	1
fl	2014			5	0	0.158	1
fl	2015	116	5	4	4	0.158	1
fl	1998			8	8	0.158	1
fm	2005	124	4	3	0	0.278	2
fm	2008	110	6	6	6	0.278	2
fm	2009	100	7	7	2	0.278	2
fm	2010	96	4	0	0	0.278	2
fm	2013	125	4	4	1	0.278	2
fn	2004	91	7	7	6	0.722	4
fn	2005		2	0	0	0.722	4
fn	2006	134	4	3	2	0.722	4
fn	2007	98	8	6	6	0.722	4
fn	2008	101	3	3	2	0.722	4
fn	2008		5	0	0	0.722	4
fn	2009	92	8	8	5	0.722	4
fn	2010	93	7	7	5	0.722	4
fn	2013	111	8	8	6	0.722	4
fn	1997			7	7	0.722	4
fn	1999	104	7	6	6	0.722	4
fn	2000	83	8	8	7	0.722	4
fn	2002	101	6	6	4	0.722	4
fo	2003	104	5	5	5	0.421	3
fo	2005	106	7	7	7	0.421	3
fo	2008	74	8	6	2	0.421	3
fo	2010	93	7	7	4	0.421	3
fo	2011	86	6	4	4	0.421	3
fo	2013	109	5	4	4	0.421	3
fo	1997			7	2	0.421	3
fo	2002	95	7	7	6	0.421	3
fp	2006	111	6	6	4	0.263	2
fp	2007	80	9	9	6	0.263	2
fp	2009	83	8	8	8	0.263	2
fp	2012	99	6	0	0	0.263	2
fp	2014	111	8	6	6	0.263	2
fr	2007				6	0.9	5
fr	2009				6	0.9	5
fr	1999	115	6	5	5	0.9	5
fr	2000	112	6	6	6	0.9	5
fr	2002	136	5	5	2	0.9	5
fr	2003	120	6	6	4	0.9	5
fr	2004	135	6	5	5	0.9	5
fr	2005		5	5	5	0.9	5
fs	2006	138	5	5	2	0.5	3
fs	2009				6	0.5	3
fs	2002	115	5	5	4	0.5	3
fs	2004		6	6	6	0.5	3
ft	2004			5	4	0.1	1
fu	2006	137	3	3	2	0.1	1
fv	2006	149	7	7	6	0.7	4
fv	2007				2	0.7	4
fv	2000	100	8	8		0.7	4
fv	2002	121	6	6	5	0.7	4
fv	2003	122	4	4	2	0.7	4
fv	2004			6	5	0.7	4
fv	2005	139	4	3	2	0.7	4
fw	2006	135	5	5	4	0.4	2
fw	2007				2	0.4	2
fw	2001	138	5	5	4	0.4	2
fw	2004	122	6	5	2	0.4	2
fx	2006	127	6	5	3	0.5	3
fx	2007				5	0.5	3
fx	2000	143	4	0	0	0.5	3
fx	2002	115	5	5	4	0.5	3
fx	2004	156	5	5	4	0.5	3
fy	2007				6	0.2	1
fy	2001	109	6	6	4	0.2	1
fz	2006				4	0.5	3
fz	2007				4	0.5	3
fz	2009				6	0.5	3
fz	2000	113	5	5	3	0.5	3
fz	2003				6	0.5	3
fz	2005			5	4	0.5	3
g	2008	107	7	0	0	0.118	1
g	2014			6	4	0.118	1
ga	1999			7	7	0.5	3
ga	2001	104	7	7	5	0.5	3
ga	2004		4	4	4	0.5	3
ga	2005			3	3	0.5	3
gb	2001				3	0.2	1
gb	2003			6	3	0.2	1
gd	1998			6	5	0.625	4
gd	1999			7	7	0.625	4
gd	2000	92	5	0	0	0.625	4
gd	2001	100	7	7	6	0.625	4
gd	2004			5		0.625	4
gd	2007	93	7	0	0	0.625	4
gd	2008	99	6	6	5	0.625	4
gd	2009	102	4	4		0.625	4
gd	2010	104	6	0	0	0.625	4
ge	2003	138	6	6	5	0.462	3
ge	2006	107	6	0	0	0.462	3
ge	2008			6	6	0.462	3
ge	2010			0	0	0.462	3
ge	2014	129	6	6	4	0.462	3
ge	2015	107	7	6	1	0.462	3
gf	1999	107	5	4	4	0.25	2
gf	2008			6	6	0.25	2
gf	2011	131	5	5	5	0.25	2
gh	1999	93	4	4	4	0.474	3
gh	2000	98	6	6	6	0.474	3
gh	2001	104	6	6	5	0.474	3
gh	2002	105	6	6	4	0.474	3
gh	2013	127	6	4	4	0.474	3
gh	2014	95	7	5	5	0.474	3
gh	2015	113	5	5	4	0.474	3
gi	1998			4	3	0.214	2
gi	1999	111	6	5	4	0.214	2
gi	2010	105	6	6	3	0.214	2
gj	1998			6	6	0.823	5
gj	1999	98	7	7	7	0.823	5
gj	2000	91	6	6	4	0.823	5
gj	2002	92	8	7	7	0.823	5
gj	2003	111	6	0	0	0.823	5
gj	2004		3	3	3	0.823	5
gj	2005	96	8	7	5	0.823	5
gj	2007	84	8	8	7	0.823	5
gj	2008		3	0	0	0.823	5
gj	2010	104	7	7	6	0.823	5
gj	2012				6	0.823	5
gj	2014	89	7	6	6	0.823	5
gj	2015		7	7	4	0.823	5
gk	2000	85	9	8	7	0.1	1
gm	2006			4	2	0.273	2
gm	2005	105	3	0	0	0.273	2
gm	2007	96	7	7	6	0.273	2
gn	2005	103	4	4	4	0.727	4
gn	2007	87	8	8	0	0.727	4
gn	2008	84	8	8	7	0.727	4
gn	2009	91	8	8	6	0.727	4
gn	2010	94	8	8	7	0.727	4
gn	2011		1	0	0	0.727	4
gn	2014	82	8	8	8	0.727	4
gn	2015	116	6	0	0	0.727	4
gs	2008			3	0	0.632	4
gs	2003	140	3	3	1	0.632	4
gs	2004			5	4	0.632	4
gs	2006			3	3	0.632	4
gs	2010				5	0.632	4
gs	2013				4	0.632	4
gs	2015				2	0.632	4
gs	1998			7	7	0.632	4
gs	1999		7	7	7	0.632	4
gs	2000	107	4	3	1	0.632	4
gs	2001	101	7	6	6	0.632	4
gs	2002	90	6	4	4	0.632	4
gt	2003			4	0	0.842	5
gt	2004			0	0	0.842	5
gt	2005	134	5	5	5	0.842	5
gt	2006			0	0	0.842	5
gt	2010	122	5	5	4	0.842	5
gt	2011	130	5	5	5	0.842	5
gt	2012	134	5	5	3	0.842	5
gt	2013	116	5	4	3	0.842	5
gt	2014	95	7	7	5	0.842	5
gt	2015			5	5	0.842	5
gt	1997			5	4	0.842	5
gt	1998			2	1	0.842	5
gt	1999		5	5	4	0.842	5
gt	1999		1	0	0	0.842	5
gt	2000	94	7	1	0	0.842	5
gt	2001	96	8	8	2	0.842	5
gt	2002	81	5	5	4	0.842	5
gu	2011	95	7	7	7	0.158	1
gu	2012	127	5	0	0	0.158	1
gu	2013	141	6	5	4	0.158	1
gu	2014	109	6	0	0	0.158	1
gv	2011	117	5	0	0	0.526	3
gw	2007	95	8	8	4	0.526	3
gw	2008				1	0.526	3
gw	2004			4	4	0.526	3
gw	2005	130	4	4	0	0.526	3
gw	2006	149	6	6	6	0.526	3
gw	2009	102	6	6	5	0.526	3
gw	2010			7	6	0.526	3
gw	2011	98	7	2	0	0.526	3
gw	1997			1	1	0.526	3
gx	2014	97	5	5	4	0.053	1
gy	2007	96	7	0	0	0.579	3
gy	2004			3	1	0.579	3
gy	2006			4	4	0.579	3
gy	2010			3	3	0.579	3
gy	2011	93	7	0	0	0.579	3
gy	2011	126	6	6	4	0.579	3
gy	2012	129	4	4	4	0.579	3
gy	2013	115	6	6	6	0.579	3
gy	2014	95	7	4	4	0.579	3
gy	2015			5	5	0.579	3
gy	1999		6	5	0	0.579	3
gz	1997				6	0.8	4
gz	1998			0	0	0.8	4
gz	1999			0	0	0.8	4
gz	2001			7	7	0.8	4
gz	2002				4	0.8	4
gz	2007		7	7		0.8	4
gz	2010	127	1	0	0	0.8	4
gz	2010				3	0.8	4
gz	2011	111	6	6	6	0.8	4
gz	2012	91	7	0	0	0.8	4
gz	2013	124	5	5	3	0.8	4
gz	2014	93	6	6	5	0.8	4
gz	2015	86	7	0	0	0.8	4
h	2015	92	7	7	7	0.118	1
ha	2015	85	7	7	2	0.053	1
hb	1997			5	5	0.545	3
hb	2009	114	6	0	0	0.545	3
hb	2010	113	7	3	1	0.545	3
hb	2012				6	0.545	3
hb	2013	100	8	8		0.545	3
hb	2015	75	10	5	3	0.545	3
hc	2015	102	7	7	1	0.053	1
hd	2014	93	6	5	5	0.053	1
he	2011	91	7	4	4	0.053	1
hf	1997		8	8	7	0.947	5
hf	1998		9	9	9	0.947	5
hf	1999	99	8	4	4	0.947	5
hf	2000		2	0	0	0.947	5
hf	2001		8	5	5	0.947	5
hf	2002	92	8	6	6	0.947	5
hf	2003	114	5	0	0	0.947	5
hf	2004		8	8	8	0.947	5
hf	2005			7	6	0.947	5
hf	2006	88	7	5	5	0.947	5
hf	2007				1	0.947	5
hf	2008	119	2	0	0	0.947	5
hf	2009		9	9	9	0.947	5
hf	2011			7	7	0.947	5
hf	2013				7	0.947	5
hf	2014	107	6	6	1	0.947	5
hf	2015				6	0.947	5
hg	2007	99	8	8		0.053	1
hh	1997		8	5	5	0.105	1
hi	2008			6	5	0.684	4
hi	2010	128	7	5	3	0.684	4
hi	2011			6	6	0.684	4
hi	2013				7	0.684	4
hi	2014			3	2	0.684	4
hi	1997			6	6	0.684	4
hi	1998				8	0.684	4
hi	2000		7	0	0	0.684	4
hi	2002	112	7	4	4	0.684	4
hi	2003	101	6	6	4	0.684	4
hi	2005	97	7		4	0.684	4
hi	2001	110	6	5	5	0.684	4
hi	2004		6	4		0.684	4
hj	2006				6	0.842	5
hj	2007	101	6	6	2	0.842	5
hj	2008	115	6	6	2	0.842	5
hj	2010	132	6	6	2	0.842	5
hj	2011	129	7	6	5	0.842	5
hj	2014				7	0.842	5
hj	2015				3	0.842	5
hj	1997			3	2	0.842	5
hj	1998			7	7	0.842	5
hj	1999				4	0.842	5
hj	2000	120	4	0	0	0.842	5
hj	2001	119	4	0	0	0.842	5
hj	2002	93	6	6	6	0.842	5
hj	2003	109	5	4	3	0.842	5
hj	2005	109	5	4	4	0.842	5
hj	2004		5	5	5	0.842	5
hk	2007			5	2	0.579	3
hk	2008			5	5	0.579	3
hk	2009	130	5	5	5	0.579	3
hk	2011	93	6	6	3	0.579	3
hk	1997			5	3	0.579	3
hk	1999				6	0.579	3
hk	2001	117	6	5	4	0.579	3
hk	2005	108	6	6	4	0.579	3
hk	2003	101	6	6	3	0.579	3
hk	2004	117	4	4		0.579	3
hl	1998		5	3	3	0.053	1
hm	2006	123	3	1	1	0.211	2
hm	2007			6	5	0.211	2
hm	2012				5	0.211	2
hm	2013				3	0.211	2
hn	2009	114	6	6	5	0.105	1
hn	2010	133	5	5	5	0.105	1
hr	2013	121	5	5	5	0.091	1
hs	2012		4	3	1	0.273	2
hs	2013		5	3	1	0.273	2
hs	2014		6	6	6	0.273	2
ht	1998			5	4	0.5	3
ht	2005	114	6	6	4	0.5	3
ht	2006				4	0.5	3
ht	2007			0	0	0.5	3
ht	2008	105	6	0	0	0.5	3
ht	2012			0	0	0.5	3
hu	2011	111	6	6	6	0.211	2
hu	2012	91	6	6	3	0.211	2
hu	2013	113	7	7	7	0.211	2
hu	2014	83	8	8	7	0.211	2
hv	1997				1	0.833	5
hv	1998				7	0.833	5
hv	1999			7	7	0.833	5
hv	2000	116	4	4	4	0.833	5
hv	2003				2	0.833	5
hv	2006				6	0.833	5
hv	2007	94	6	6	5	0.833	5
hv	2008	112	7	6	5	0.833	5
hv	2009	106	6	6	4	0.833	5
hv	2010	97	8	0	0	0.833	5
hv	2011	109	5	5	4	0.833	5
hv	2013	109	6	6	4	0.833	5
hv	2014	92	6	3	2	0.833	5
hv	2015	113	6	5	4	0.833	5
hw	2005			6	6	0.421	3
hw	2006	127	6	6	6	0.421	3
hw	2007	103	4	4	0	0.421	3
hw	2008	94	5	5	5	0.421	3
hw	2009	99	6	6	5	0.421	3
hw	2010	97	8	8	8	0.421	3
hw	2012	91	6	6	5	0.421	3
hw	2015	93	6	5	5	0.421	3
hx	2001		8	8	8	0.154	1
hx	2002	109	7	7	6	0.154	1
i	1997		8	8	8	0.556	3
i	1998			6	6	0.556	3
i	1999	104	7	5	5	0.556	3
i	2000	84	7	7	5	0.556	3
i	2001	88	6	6	5	0.556	3
i	2004	121	5	4	4	0.556	3
i	2010	103	7	0	0	0.556	3
i	2011	91	8	8	5	0.556	3
i	2012	99	6	6	4	0.556	3
i	2015	91	8	8	5	0.556	3
ie	2006				4	0.583	3
ie	2007			6		0.583	3
ie	2008	120	5	5	2	0.583	3
ie	2011	108	6	6	5	0.583	3
ie	2012	90	7	7	3	0.583	3
ie	2013	115	5	5	4	0.583	3
ie	2014	103	6	6	0	0.583	3
if	1997			5	2	0.947	5
if	1998			5	5	0.947	5
if	1999				3	0.947	5
if	2000	98	7	7	6	0.947	5
if	2001	96	4	3	3	0.947	5
if	2002	98	8	8	7	0.947	5
if	2003	122	6	6		0.947	5
if	2005	123	5	5	3	0.947	5
if	2006	93	6	6	4	0.947	5
if	2007	88	7	7	5	0.947	5
if	2008	81	9	9	0	0.947	5
if	2009	94	7	7	1	0.947	5
if	2010	97	7	5	4	0.947	5
if	2013	124	5	0	0	0.947	5
if	2014	98	8	6	5	0.947	5
if	2015			0	0	0.947	5
if	2011	112	7	7	7	0.947	5
if	2012	121	4	4	1	0.947	5
ig	1997			5	5	0.526	3
ig	1998			3	3	0.526	3
ig	1999	135	5		0	0.526	3
ig	2000			1	1	0.526	3
ig	2001	104	6	4	2	0.526	3
ig	2006	130	4	0	0	0.526	3
ig	2007	91	9	9	0	0.526	3
ig	2008			0	0	0.526	3
ig	2014			4	1	0.526	3
ig	2015	98	7	7	2	0.526	3
ih	2000	85	7	5	0	0.688	4
ih	2003	123	5	4	4	0.688	4
ih	2004	108	5	4	0	0.688	4
ih	2008	98	7	7		0.688	4
ih	2009	102	6	6	6	0.688	4
ih	2013	112	7	0	0	0.688	4
ih	2010	105	7	0	0	0.688	4
ih	2011	113	6	6	0	0.688	4
ih	2012	110	7	7	5	0.688	4
ii	1998				2	0.824	5
ii	2001	114	6		2	0.824	5
ii	2002	99	7	7	5	0.824	5
ii	2003	115	6	5	5	0.824	5
ii	2004	115	5	3	2	0.824	5
ii	2005	102	6	6	4	0.824	5
ii	2007	102	6	6		0.824	5
ii	2008	112	2	2	2	0.824	5
ii	2008			0	0	0.824	5
ii	2009	102	6	6		0.824	5
ii	2010	90	7	7	6	0.824	5
ii	2011	110	7	5	2	0.824	5
ii	2012	119	6	6	5	0.824	5
ii	2014	90	7	7	6	0.824	5
ii	2015	105	7	7	5	0.824	5
ij	1999				4	0.875	5
ij	2000		8	8		0.875	5
ij	2001	116	4	0	0	0.875	5
ij	2004	134	6	5	5	0.875	5
ij	2005	130	7	6	6	0.875	5
ij	2007	94	6	6	4	0.875	5
ij	2008	105	5			0.875	5
ij	2009	116	2	2	0	0.875	5
ij	2011			0	0	0.875	5
ij	2006	113	6	3	0	0.875	5
ij	2010	119	4	4	3	0.875	5
ij	2012	95	6	5	2	0.875	5
ij	2014	88	7	6	3	0.875	5
ij	2015	105	7	5	0	0.875	5
ik	2004	135	5	5	5	0.467	3
ik	2005	118	5	3	0	0.467	3
ik	2006	121	5	5	5	0.467	3
ik	2007	94	6	4	2	0.467	3
ik	2011	108	6	6	4	0.467	3
ik	2012	121	4	4	4	0.467	3
il	1997			3	3	0.533	3
il	2005	109	6	3	3	0.533	3
il	2006	114	5	4	2	0.533	3
il	2013	116	3	3	3	0.533	3
il	2012	107	8	8	5	0.533	3
il	2014	95	7	7	6	0.533	3
il	2015	105	7	7	5	0.533	3
im	2013	123	6	5	3	0.182	1
im	2012	114	6	5	2	0.182	1
im	2014	94	8	8	4	0.182	1
im	2015	106	6	6	0	0.182	1
in	1999	101	5	3	0	0.75	4
in	2000	85	7	7	4	0.75	4
in	2001	130	6	6	2	0.75	4
in	2004	134	6	6	4	0.75	4
in	2005	101	7	0	0	0.75	4
in	2006	114	5	0	0	0.75	4
in	2006		3	0	0	0.75	4
in	2007	94	6	6	5	0.75	4
in	2008			0	0	0.75	4
in	2013	103	6	6	3	0.75	4
in	2011	107	7	7	5	0.75	4
in	2015	105	7	1	0	0.75	4
io	1999		6	0	0	0.688	4
io	2000	84	8	8	6	0.688	4
io	2002	78	8	8	7	0.688	4
io	2004	136	4	3	2	0.688	4
io	2005	121	7	7	5	0.688	4
io	2006		1	0	0	0.688	4
io	2006	137	6	6		0.688	4
io	2007	103		0	0	0.688	4
io	2008	98	7	7	3	0.688	4
io	2009	117	6	5		0.688	4
io	2014				1	0.688	4
io	2010	112	5	5	4	0.688	4
ip	2000	101	6	0	0	0.5	3
ip	1999		7	0	0	0.5	3
ip	2006		1	0	0	0.5	3
ip	2006	120	5	5	4	0.5	3
ip	2007	94	6		0	0.5	3
ip	2008	116	6	6		0.5	3
ip	2009	101	7	5	5	0.5	3
ix	2005	131	5	4	4	0.765	4
ix	2006	103	6	6	5	0.765	4
ix	2007	105		0	0	0.765	4
ix	2007	136	6	0	0	0.765	4
ix	2008	122	3	3	3	0.765	4
ix	2010	99	4	0	0	0.765	4
ix	2013	113	6	5	4	0.765	4
ix	2014	92	5	5	4	0.765	4
ix	1998				7	0.765	4
ix	1999	125	6	6	5	0.765	4
ix	2001	106	8	8	8	0.765	4
ix	2000	99	6	0	0	0.765	4
ix	2000	132	5	3	1	0.765	4
iy	2002			0	0	0.167	1
iy	2014	92	5	5	5	0.167	1
iy	2015	85	7	7		0.167	1
j	1997	110	7	0	0	0.471	3
j	2005	112	4	4	0	0.471	3
j	2008	116	2	0	0	0.471	3
j	2009	117	2	0	0	0.471	3
j	2014			6	4	0.471	3
j	2015	104	6	0	0	0.471	3
ja	1997			6	5	0.667	4
ja	2003	114	6	6	3	0.667	4
ja	2004	96	7	7	0	0.667	4
ja	2005	96	9	7	4	0.667	4
ja	2006			7	6	0.667	4
ja	2007	85	8	8	7	0.667	4
ja	2008	98	8	8	6	0.667	4
ja	2009		10	9	7	0.667	4
ja	2010	97	8	1	1	0.667	4
ja	2011	94	7	7	7	0.667	4
ja	2012			5		0.667	4
ja	2014	85	6	6	4	0.667	4
jb	1999				4	0.111	1
jb	2015	93	6	6	4	0.111	1
jc	1999	94	6	5	5	0.938	5
jc	2000	118	6	1	1	0.938	5
jc	2001	105	4	4	4	0.938	5
jc	2002		1	0	0	0.938	5
jc	2003	108	5	5	3	0.938	5
jc	2005	97	7	7	7	0.938	5
jc	2007	84	7	6	6	0.938	5
jc	2009	105	5	5	5	0.938	5
jc	2010	109	8	6	5	0.938	5
jc	2012	88	8	8	8	0.938	5
jc	2013	113	7	7	5	0.938	5
jc	2015	87	7	5	5	0.938	5
jd	2004			6	5	0.412	3
jd	2006	91	7	7	7	0.412	3
jd	2007	123	6	6	4	0.412	3
jd	2008	88	8	8	8	0.412	3
jd	2008		5	5		0.412	3
jd	2009	114	6	6	0	0.412	3
jd	2012	109	5	5		0.412	3
jd	2012	113	5	4	4	0.412	3
jd	2013	112	6	6	4	0.412	3
jd	2015	80	7	6	5	0.412	3
je	2008	134	2	2	2	0.125	1
je	2012	119	4	0	0	0.125	1
jf	2012	105	4	0	0	0.125	1
jf	2014	113	6	5	4	0.125	1
jg	2002			0	0	0.357	2
jg	2004			3	3	0.357	2
jg	2005			0	0	0.357	2
jg	2006	113	5	0	0	0.357	2
jh	2006	111	7	7	7	0.286	2
jh	2007	90	8	0	0	0.286	2
jh	2008	113	5	0	0	0.286	2
jh	2010	110	7	0	0	0.286	2
ji	1998			7	5	0.765	4
ji	2001	104	5	5	0	0.765	4
ji	2000	103	6	6	0	0.765	4
ji	2004			6	6	0.765	4
ji	2005	118	6	6	4	0.765	4
ji	2006	120	6	5	5	0.765	4
ji	2007	107	6	6	5	0.765	4
ji	2008	113	4	4	4	0.765	4
ji	2009	140	5	4	0	0.765	4
ji	2010	107	6	6	0	0.765	4
ji	2011	110	7	6	6	0.765	4
ji	2012	81	8	8	6	0.765	4
ji	2013	113	7	7	2	0.765	4
jk	2000	111	5	5	5	0.294	2
jk	2002	79	6	6	2	0.294	2
jk	2003	158	2	2	2	0.294	2
jk	2012	88	8	8	5	0.294	2
jk	2013	112	6	6	5	0.294	2
jl	2005	113	6	5	5	0.176	1
jl	2012	104	7	4	2	0.176	1
jl	2013	121	6	5	2	0.176	1
jm	2005	110	4	4	3	0.389	2
jm	2007	116	6	6	4	0.389	2
jm	2011			4	4	0.389	2
jm	2012	103	7	7	7	0.389	2
jm	2013	126	1	0	0	0.389	2
jm	2013				2	0.389	2
jm	2014	98		0	0	0.389	2
jm	2015	101	6	6	0	0.389	2
jn	2012	92	7	6	5	0.222	2
jn	2013	113	6	4	3	0.222	2
jn	2014	121	6	0	0	0.222	2
jn	2015	101	6	6	0	0.222	2
jo	1997			6	6	0.222	2
jo	2012	104	5	3	3	0.222	2
jo	2014	126	4	0	0	0.222	2
jo	2015	87	7	0	0	0.222	2
jp	1999	116	5	0	0	0.278	2
jp	2001	123	6	3	2	0.278	2
jp	2011	100	7	4		0.278	2
jp	2014	98	6	0	0	0.278	2
jp	2015	101	6	6	5	0.278	2
jr	2015	99	8	0	0	0.077	1
k	1997				3	0.75	4
k	2000	115	5	5	5	0.75	4
k	2001	103	7	7	7	0.75	4
k	2002	83	8	7	7	0.75	4
k	2003	91	8	8	8	0.75	4
k	2004	103	4	4	0	0.75	4
l	2001	105	5	5	3	0.267	2
l	2002	83	8	8	7	0.267	2
l	2005	101		0	0	0.267	2
m	1998				7	0.944	5
m	1999			7	6	0.944	5
m	2000	95	2	0	0	0.944	5
m	2002	115	6	0	0	0.944	5
m	2004	97	6	6	5	0.944	5
m	2006	112	7	7	6	0.944	5
m	2007	112	8	7	7	0.944	5
m	2008	116	5	5	4	0.944	5
m	2009	97	5	2	0	0.944	5
m	2010	99	6	6	1	0.944	5
m	2011	94	7	7	4	0.944	5
m	2012	87	7	6	1	0.944	5
m	2013	101	7	0	0	0.944	5
m	2014	84	7	7	7	0.944	5
m	2015				4	0.944	5
n	1997		6	0	0	0.176	1
n	1998		9	9	7	0.176	1
n	2000	90	7	7	3	0.176	1
o	1998			7	5	0.611	4
o	2002	132	4	0	0	0.611	4
o	2003			4	4	0.611	4
o	2009	95	6	0	0	0.611	4
o	2011			0	0	0.611	4
o	2013	110	6	5	5	0.611	4
o	2014	107	6	6	3	0.611	4
o	2015	109	5	5	4	0.611	4
p	2002	111	5	5	0	0.4	2
p	2005				1	0.4	2
p	2008			4	3	0.4	2
p	2012	101	4	3	3	0.4	2
p	2013			4	4	0.4	2
r	1999			6	6	0.188	1
r	2004				3	0.188	1
r	2005				5	0.188	1
s	2000	98	6	6		0.706	4
s	2001	112	5	3	3	0.706	4
s	2002	112	4	0	0	0.706	4
s	2004	110	7	5	5	0.706	4
s	2006	115	5	5	4	0.706	4
s	2008	121	5	4	4	0.706	4
s	2009	119	2	2	2	0.706	4
s	2010	123	5	5	4	0.706	4
s	2012	100	5	5	3	0.706	4
s	2013	121	5	5	4	0.706	4
s	2014	104	1	0	0	0.706	4
s	2015	96	5	5	4	0.706	4
st	2012	105	5	5		0.5	3
st	2015	99	7	7	7	0.5	3
t	2000	120	6	6		0.471	3
t	2002	118	5	5	3	0.412	3
t	2012	114	6	6	6	0.412	3
t	2013	121	5	5	5	0.412	3
t	2014	98	5	5	0	0.412	3
t	2015	108	6	6	5	0.412	3
u	2001	122	3	0	0	0.286	2
u	2013	124	3	6	6	0.214	2
u	2015			6	6	0.214	2
w	2014	103	7	7	3	0.143	1
w	2015	132	3	0	0	0.143	1
xa	1999	98	8	8	8	0.75	4
xa	2007	83	7	7	5	0.75	4
y	1998			7	2	0.222	2
y	1999		6	6		0.222	2
z	1997				1	0.7	4
z	1999		3	0	0	0.7	4
z	2000	117	6	5	4	0.7	4
z	2001	105	5	5	3	0.7	4
z	2007			5	5	0.7	4
z	2008			4		0.7	4

## Sheet: ADULT BODY CONDITION
TERRITORY ID	RING NO	SEX	DATE OF CAPUTRE	FOREARM LENGTH	BODY MASS	MASS-SIZE RESIDUALS	OCCUPANCY	OCCUPANCY CATEGORY
a	AC3107	F	124	284	8.4	-1.238	0.7273	4
ab	AC4711	M	287	292	10.6	-0.23	0.3158	2
ab	AS7446	F	238	289	9.8	-0.322	0.3158	2
ac	AC2172	M	250	299	12	0.493	0.2105	2
ac	AS9759	F	250	284	9.5	-0.138	0.2105	2
ad	AC1648	F	242	274	8	-0.671	0.1333	1
ae	AC0856	M	306	294	10.8	-0.223	0.6316	4
ae	AS0556	F	280	282	9.9	0.455	0.6316	4
af	AC0838	M	236	299	12.2	0.693	0.5294	3
af	AS9208	F	162	263	6.7	-0.907	0.5294	3
af	AC6583	F	151	273	8	-0.574	0.5294	3
ag	AC6682	M	222	294	11.2	0.177	0.2105	2
ah	AC6581	F	256	265	11	3.199	0.3158	2
aj	AH5468	M	253	310	11.2	-1.37	0.2353	2
aj	AH5467	F	253	278	8.4	-0.658	0.2353	2
ak	AC3110	M	145	302	12	0.203	0.0625	1
am	AC5433	M	237	304	12	0.01	0.75	4
an	AC3642	M	196	324	13	-0.924	0.8235	5
ao	AC3190	M	276	287	12.2	1.854	1	5
ao	AC5472	F	266	289	9.2	-0.922	1	5
ap	AH4552	M	126	304	12.8	0.81	0.2	1
aq	AC7628	M	159	304	11.6	-0.39	0.4706	3
ar	AS8093	F	264	280	10	0.749	0.5	3
as	AS9752	F	243	290	9.3	-0.918	0.5833	3
at	AS9769	F	244	285	9.5	-0.235	0.1	1
au	AH3539	F	152	280	7.8	-1.451	1	5
aw	AH3545	M	130	299	11.3	-0.207	0.2222	2
ax	AH3538	M	152	299	11.4	-0.107	0.1111	1
az	AC4433	F	124	279	11.2	2.045	0.2222	2
b	AS0681	M	196	320	14	0.463	0.5556	3
ba	AC6701	M	234	308	13.2	0.823	0.5882	3
bb	AS9719	M	234	322	12.2	-1.531	0.0769	1
bc	AS8069	M	257	304	13	1.01	0.5455	3
bc	AS8070	F	257	280	9.2	-0.051	0.5455	3
bd	AS8097	M	268	299	12.5	0.993	0.2	1
bd	AS8086	F	263	268	10.5	2.409	0.2	1
bf	AC6845	M	145	310	10.8	-1.77	0.3158	2
bf	AC3292	F	123	277	9.4	0.439	0.3158	2
bg	AH0347	F	240	271	9.6	1.219	0.5789	3
bh	AC6859	F	188	270	9.6	1.316	0.1579	1
bi	AS8074	M	257	304	14	2.01	0.625	4
bi	AS8075	F	257	274	9.5	0.829	0.625	4
bj	AC1627	F	212	270	8.8	0.516	0.5333	3
bk	AC3109	M	144	289	11.2	0.66	0.875	5
bl	AC3635	F	117	273	9	0.426	0.6875	4
bm	AC6846	M	147	306	11.6	-0.584	0.8235	5
bm	AC7627	M	131	307	12.6	0.32	0.8235	5
bn	AS9755	F	241	266	8.9	1.003	0.75	4
bo	AH4554	F	135	281	9	-0.348	0.1818	1
bu	AH4553	M	135	300	9	-2.603	0.4615	3
bw	AH4549	M	118	301	13	1.3	0.4737	3
bw	AH4547	F	106	261	9	1.586	0.4737	3
by	AS7423	M	229	296	11.5	0.284	0.8235	5
by	AC3196	M	238	287	12.3	1.954	0.8235	5
by	AC3576	M	264	295	10.4	-0.72	0.8235	5
by	AS7424	F	229	279	10	0.845	0.8235	5
by	AC7606	F	209	270	8.9	0.616	0.8235	5
bz	AS7048	F	116	266	8	0.103	0.8333	5
c	AC3431	M	240	295	11.2	0.08	0.1176	1
c	AC3430	F	240	280	8.1	-1.151	0.1176	1
ca	AC6236	F	108	267	8.3	0.306	0.5789	3
cb	AS7039	M	291	311	12	-0.667	0.8	4
cb	AH1322	F	148	274	7.5	-1.171	0.8	4
cd	AH4594	M	223	305	12	-0.087	0.0526	1
cd	AH4557	F	140	290	9.4	-0.818	0.0526	1
ce	AH5500	F	121	280	7.2	-2.051	0.0526	1
cf	AC4014	F	121	284	8.6	-1.038	0.5455	3
cg	AC6747	M	254	297	12.4	1.087	0.9474	5
cg	AC0804	F	254	278	9.9	0.842	0.9474	5
ch	AH3543	M	127	296	11.4	0.184	0.2727	2
ch	AH3386	F	212	266	8.8	0.903	0.2727	2
ci	AC0824	M	234	296	11.6	0.384	0.1538	1
cj	AC6560	M	282	300	10.6	-1.003	0.8333	5
ck	AC6559	M	282	302	11.2	-0.597	0.4211	3
ck	AC6731	F	242	284	9.1	-0.538	0.4211	3
cl	AC4796	M	223	306	12.8	0.616	0.7273	4
cl	AC6570	F	126	275	8.3	-0.468	0.7273	4
cm	AC6582	M	165	290	12.4	1.764	0.7647	4
cm	AH4550	M	120	293	11.8	0.874	0.7647	4
cn	AC3623	M	104	294	10	-1.023	0.6667	4
cn	AC6684	F	232	285	9.6	-0.135	0.6667	4
co	AH4551	F	125	268	7	-1.091	0.1111	1
cp	AS9209	F	186	276	10	1.136	0.6429	4
cr	AC5414	M	231	311	12.8	0.133	0.3889	2
cr	AH3416	M	237	300	13	1.397	0.3889	2
cr	AH3417	F	237	283	9.3	-0.241	0.3889	2
d	AS9751	F	243	279	9.4	0.245	0.75	4
e	AC2169	M	235	281	9.2	-0.566	0.2667	2
f	AS0737	M	244	312	12.4	-0.364	0.9444	5
f	AC3108	M	224	308	11.8	-0.577	0.9444	5
f	AH3317	F	248	273	9.7	1.126	0.9444	5
g	AS8550	M	94	292	10.5	-0.33	0.7368	4
g	AC3060	M	332	303	12	0.107	0.7368	4
g	AC5493	M	222	305	12.8	0.713	0.7368	4
g	AH0410	M	223	303	11.9	0.007	0.7368	4
g	AC9986	F	222	275	8.7	-0.068	0.7368	4
g	AH0409	F	223	275	9.2	0.432	0.7368	4
g	AH3312	F	245	287	9.5	-0.428	0.7368	4
h	AC2607	M	244	309	11.8	-0.674	0.5789	3
h	AC0363	F	226	269	9.4	1.213	0.5789	3
i	AC5419	M	231	299	12.8	1.293	0.1579	1
i	AC0829	M	239	297	10.6	-0.713	0.1579	1
i	AC2552	M	251	304	12.2	0.21	0.1579	1
i	AC3632	F	144	276	6.8	-2.064	0.1579	1
i	AS1343	F	239	274	9.8	1.129	0.1579	1
j	AC2552	M	231	304	11.4	-0.59	0.7895	4
j	AH0348	F	251	283	10.4	0.859	0.7895	4
l	AC7663	M	212	303	12.2	0.307	0.3684	2
m	AS4598	M	261	299	11	-0.507	0.9412	5
n	AC6557	M	276	295	10.4	-0.72	0.9091	5
n	AC5439	M	249	304	12.6	0.61	0.9091	5
n	AC6558	F	276	295	11.2	0.498	0.9091	5
n	AH3422	F	249	287	8.8	-1.128	0.9091	5
o	AH3582	M	209	304	11.8	-0.19	0.2353	2
o	AH3581	F	209	279	8.7	-0.455	0.2353	2
p	AC2964	M	111	302	8.2	-3.597	0.5833	3
r	AC6842	F	121	280	8.5	-0.751	0.5294	3
s	AH3536	M	144	295	12.2	1.08	0.875	5
w	AC2155	F	229	287	7.4	-2.528	0.3333	2
x	AC5406	M	224	318	11.4	-1.944	0.8	4
x	AC5403	F	224	284	9.2	-0.438	0.8	4
z	AC3192	M	238	303	11.8	-0.093	0.25	2
z	AS7428	F	229	282	8	-1.445	0.25	2
